# Supplementary material for: Increasing frequency of combination medical therapy in the treatment of acromegaly with the GH receptor antagonist pegvisomant
Source: PubMed Central journal article supplement (PMC5863474; doi:10.1530/eje-17-0996), 2018-01-25
Supplement: eje-178-321-t001.pdf [file eje-178-321-t001.pdf]

**Supplementary Table 1.** Total number of patients (All) and number and percentage of patients with history of no switch of treatment ('No switch') by visit since pegvisomant start on Combo SSA, Combo DA and Peg mono, respectively.

| Number of patients by medical treatment modality |                  |                         |     |                  |                         |     |                  |                         |     |                      |                         |     |
|--------------------------------------------------|------------------|-------------------------|-----|------------------|-------------------------|-----|------------------|-------------------------|-----|----------------------|-------------------------|-----|
| Years since peg start                            | Combo SSA        |                         |     | Combo DA         |                         |     | Peg mono         |                         |     | Total <sup>§§§</sup> |                         |     |
|                                                  | All <sup>§</sup> | No switch <sup>§§</sup> | %   | All <sup>§</sup> | No switch <sup>§§</sup> | %   | All <sup>§</sup> | No switch <sup>§§</sup> | %   | All <sup>§</sup>     | No switch <sup>§§</sup> | %   |
| 0                                                | 768              | 768                     | 100 | 123              | 123                     | 100 | 1128             | 1128                    | 100 | 2019                 | 2019                    | 100 |
| 1                                                | 607              | 559                     | 92  | 98               | 76                      | 78  | 999              | 882                     | 88  | 1704                 | 1517                    | 89  |
| 2                                                | 547              | 443                     | 81  | 104              | 60                      | 58  | 901              | 740                     | 82  | 1552                 | 1243                    | 80  |
| 3                                                | 475              | 341                     | 72  | 109              | 55                      | 50  | 796              | 628                     | 79  | 1380                 | 1024                    | 74  |
| 4                                                | 381              | 241                     | 63  | 93               | 43                      | 46  | 673              | 505                     | 75  | 1147                 | 789                     | 69  |
| 5                                                | 313              | 175                     | 56  | 69               | 31                      | 45  | 570              | 395                     | 69  | 952                  | 601                     | 63  |
| 6                                                | 251              | 123                     | 49  | 56               | 22                      | 39  | 458              | 307                     | 67  | 765                  | 452                     | 59  |
| 7                                                | 195              | 85                      | 44  | 39               | 15                      | 38  | 337              | 216                     | 64  | 571                  | 316                     | 55  |
| 8                                                | 136              | 58                      | 43  | 28               | 8                       | 29  | 215              | 148                     | 69  | 379                  | 214                     | 56  |
| 9                                                | 80               | 30                      | 38  | 12               | 2                       | 17  | 127              | 90                      | 71  | 219                  | 122                     | 56  |
| 10                                               | 38               | 11                      | 29  | 3                | 0                       | 0   | 60               | 45                      | 75  | 101                  | 56                      | 55  |

<sup>§</sup>Total number of patients on respective treatment. <sup>§§</sup>Total number of patients with no history of switch of treatment at a specific year since peg start. %: percentage of patients at a specific year without a history of treatment switch. <sup>§§§</sup>Patients without Peg dose or on other treatment than presented are excluded from the table. (At pegstart it was 24 patients or 1.17%). Note also that different patients have different lengths of follow-up (From 'peg start mono') up to 10 years of follow-up). The column 'All' gives the number of patients with the specific number of years of follow-up (however, with potential history of switch). The 'No switch' column gives the corresponding number of patients who have consecutively stayed on the same treatment modality since peg start.
