# Supplementary material for: Increasing frequency of combination medical therapy in the treatment of acromegaly with the GH receptor antagonist pegvisomant
Source: PubMed Central journal article supplement (PMC5863474; doi:10.1530/eje-17-0996), 2018-01-25
Supplement: eje-178-321-t002.pdf [file eje-178-321-t002.pdf]

**Supplementary Table 2.** Mean and SD of daily pegvisomant dose and average IGF-I/ULN by treatment and year since pegvisomant start. All available IGF-I data including data after possible switch of treatment modality.

| Years since<br>peg start | Daily pegvisomant dose mg/day, Mean (SD) |             |             |                            |             |             |            |             |             |             |             |             |  |
|--------------------------|------------------------------------------|-------------|-------------|----------------------------|-------------|-------------|------------|-------------|-------------|-------------|-------------|-------------|--|
|                          | Combo SSA                                |             |             | Combo DA                   |             |             | Peg mono   |             |             | Total       |             |             |  |
|                          | IGF-I<ULN                                | IGF-I>ULN   | All*        | IGF-I<ULN                  | IGF-I>ULN   | All*        | IGF-I<ULN  | IGF-I>ULN   | All*        | IGF-I<ULN   | IGF-I >ULN  | All*        |  |
| 0                        | 8.9 (4.1)                                | 10.6 (8.4)  | 10.1 (7.2)  | 10.2 (2.3)                 | 12.1 (9.1)  | 11.3 (7.3)  | 11.6 (5.1) | 12.2 (8.2)  | 12.3 (8.2)  | 10.7 (4.8)  | 11.6 (8.3)  | 11.4 (7.8)  |  |
| 1                        | 13.4 (7.1)                               | 14.5 (8.9)  | 13.6 (7.6)  | 15.1 (6.9)                 | 15.2 (6.9)  | 15.1 (6.3)  | 15.6 (7.1) | 16.9 (7.4)  | 15.8 (7.4)  | 14.9 (7.2)  | 15.9 (7.9)  | 15.0 (7.5)  |  |
| 2                        | 14.0 (7.8)                               | 16.7 (9.3)  | 14.5 (8.1)  | 16.2 (5.3)                 | 20.2 (8.1)  | 17.5 (7.2)  | 16.3 (7.5) | 18.4 (8.2)  | 16.8 (7.7)  | 15.6 (7.5)  | 17.9 (8.7)  | 16.0 (7.9)  |  |
| 5                        | 17.9 (11.7)                              | 22.3 (12.0) | 17.9 (11.1) | 18.8 (7.3)                 | 19.9 (9.1)  | 19.0 (9.1)  | 17.6 (8.3) | 20.3 (10.0) | 18.0 (8.6)  | 17.6 (9.1)  | 20.9 (10.6) | 18.1 (9.6)  |  |
| 7                        | 21.3 (17.0)                              | 19.7 (10.9) | 19.4 (12.8) | 22.0 (6.2)                 | 28.6 (11.7) | 21.6 (9.3)  | 15.9 (6.9) | 19.4 (9.5)  | 18.1 (9.2)  | 17.6 (10.2) | 20.3 (10.5) | 18.8 (10.6) |  |
|                          |                                          |             |             | <b>IGF-I/ULN Mean (SD)</b> |             |             |            |             |             |             |             |             |  |
| 0                        |                                          |             | 2.03 (1.15) |                            |             | 1.95 (1.11) |            |             | 1.87 (0.96) |             |             | 1.93 (1.04) |  |
| 1                        |                                          |             | 1.12 (0.71) |                            |             | 1.13 (0.78) |            |             | 1.02 (0.62) |             |             | 1.06 (0.66) |  |
| 2                        |                                          |             | 1.06 (0.56) |                            |             | 1.06 (0.58) |            |             | 0.97 (0.51) |             |             | 1.00 (0.54) |  |
| 5                        |                                          |             | 1.09 (0.64) |                            |             | 1.14 (0.99) |            |             | 0.91 (0.53) |             |             | 0.98 (0.52) |  |
| 7                        |                                          |             | 1.15 (0.58) |                            |             | 0.99 (0.37) |            |             | 0.90 (0.49) |             |             | 0.98 (0.52) |  |

\*Also including patients without IGF-I measurements.
