# Supplementary material for: Increasing frequency of combination medical therapy in the treatment of acromegaly with the GH receptor antagonist pegvisomant
Source: PubMed Central journal article supplement (PMC5863474; doi:10.1530/eje-17-0996), 2018-01-25
Supplement: eje-178-321-t003.pdf [file eje-178-321-t003.pdf]

**Supplementary Table 3.** Number of patients with IGF-I measurement and number and percentage of patients with normal IGF-I value (IGF-I<ULN) by year since peg start and treatment category. IGF-I data at and after any treatment category switch are excluded.

| Years since<br>pegstart | Number of patients by medical treatment category |                      |      |                  |                      |      |                  |                      |      |                      |                      |      |
|-------------------------|--------------------------------------------------|----------------------|------|------------------|----------------------|------|------------------|----------------------|------|----------------------|----------------------|------|
|                         | Combo SSA                                        |                      |      | Combo DA         |                      |      | Peg mono         |                      |      | Total <sup>§§§</sup> |                      |      |
|                         | All <sup>§</sup>                                 | Normal <sup>§§</sup> | %    | All <sup>§</sup> | Normal <sup>§§</sup> | %    | All <sup>§</sup> | Normal <sup>§§</sup> | %    | All <sup>§</sup>     | Normal <sup>§§</sup> | %    |
| 0                       | 471                                              | 51                   | 10.8 | 88               | 13                   | 14.8 | 817              | 107                  | 13.1 | 1376                 | 171                  | 12.4 |
| 1                       | 337                                              | 183                  | 54.3 | 55               | 29                   | 52.7 | 596              | 366                  | 61.4 | 988                  | 578                  | 58.5 |
| 2                       | 266                                              | 155                  | 58.3 | 48               | 30                   | 62.5 | 523              | 347                  | 66.4 | 837                  | 532                  | 63.6 |
| 3                       | 185                                              | 117                  | 63.2 | 43               | 24                   | 55.8 | 421              | 279                  | 66.3 | 649                  | 420                  | 64.7 |
| 4                       | 120                                              | 74                   | 61.7 | 27               | 17                   | 63.0 | 345              | 225                  | 65.2 | 492                  | 316                  | 64.2 |
| 5                       | 66                                               | 40                   | 60.6 | 21               | 16                   | 76.2 | 263              | 191                  | 72.6 | 350                  | 247                  | 70.6 |
| 6                       | 44                                               | 27                   | 61.4 | 9                | 5                    | 55.6 | 183              | 123                  | 67.2 | 236                  | 155                  | 65.7 |
| 7                       | 31                                               | 13                   | 41.9 | 7                | 5                    | 71.4 | 120              | 85                   | 70.8 | 158                  | 103                  | 65.2 |

<sup>§</sup>Total number of patients on respective treatment with IGF-I measurement reported. <sup>§§</sup>Total number of patients with normal IGF-I. %: percentage of patients with normal IGF-I (IGF-I < ULN). <sup>§§§</sup>Patients without an IGF-I measurement, Pegvisomant dose or on other treatment than presented, and data at or after switch of treatment are excluded from the table.
