# Supplementary material for: Increasing frequency of combination medical therapy in the treatment of acromegaly with the GH receptor antagonist pegvisomant
Source: PubMed Central journal article supplement (PMC5863474; doi:10.1530/eje-17-0996), 2018-01-25
Supplement: eje-178-321-t004.pdf [file eje-178-321-t004.pdf]

**Supplementary Table 4.** Summary of pituitary tumor imaging results from last MRI during combo SSA combo DA or Peg mono exposure periods combined.

Local versus Central reading. Data for last MRI was retrieved at least 30 days after the first reading (before pegvisomant start).

| Local MRI reading             | Central MRI reading result, No. |         |           |           |                               |           |                      |          |
|-------------------------------|---------------------------------|---------|-----------|-----------|-------------------------------|-----------|----------------------|----------|
|                               | Total                           |         | Increased | Decreased | Increased<br>and<br>decreased | No change | Insufficient<br>data | Not done |
| Result                        | No                              | (%)     |           |           |                               |           |                      |          |
| Increase only, at least once  | 119                             | (7.2)   | 20        | 7         | 3                             | 20        | 6                    | 63       |
| Decreased only, at least once | 323                             | (19.6)  | 7         | 48        | 1                             | 24        | 15                   | 228      |
| Both increased and decreased  | 54                              | (3.3)   | 13        | 10        | 3                             | 5         | 5                    | 18       |
| No change                     | 1145                            | (69.5)  | 2         | 9         | 1                             | 19        | 4                    | 1110     |
| Missing                       | 6                               | (0.4)   | 0         | 1         | 2                             | 3         | 0                    | 0        |
| Total                         | 1647                            | (100.0) | 42        | 75        | 10                            | 71        | 30                   | 1419     |
